# Supplementary material
Source: PubMed Central journal article supplement (PMC10207632)
Supplement: 12859_2023_5342_MOESM1_ESM.pdf [file 12859_2023_5342_MOESM1_ESM.pdf]

# Empowering Biologists to Decode Omics Data: The Genekitr R Package and Web Server

Yunze Liu<sup>1,2,3</sup>, Gang Li<sup>1,2,3\*</sup>

<sup>1</sup>Ministry of Education Frontiers Science Center for Precision Oncology, Faculty of Health Sciences, University of Macau, Macau SAR, China

<sup>2</sup>Cancer Centre, Faculty of Health Sciences, University of Macau, Macau SAR, China

<sup>3</sup>Department of Biomedical science, Faculty of Health Sciences, University of Macau, Macau SAR, China

\*Correspondence: gangli@um.edu.mo

## Supplementary Figure and Tables

**Table S1.** GO CC enrichment analysis result without simplification method.

**Table S2.** GO CC enrichment analysis result after simplification.

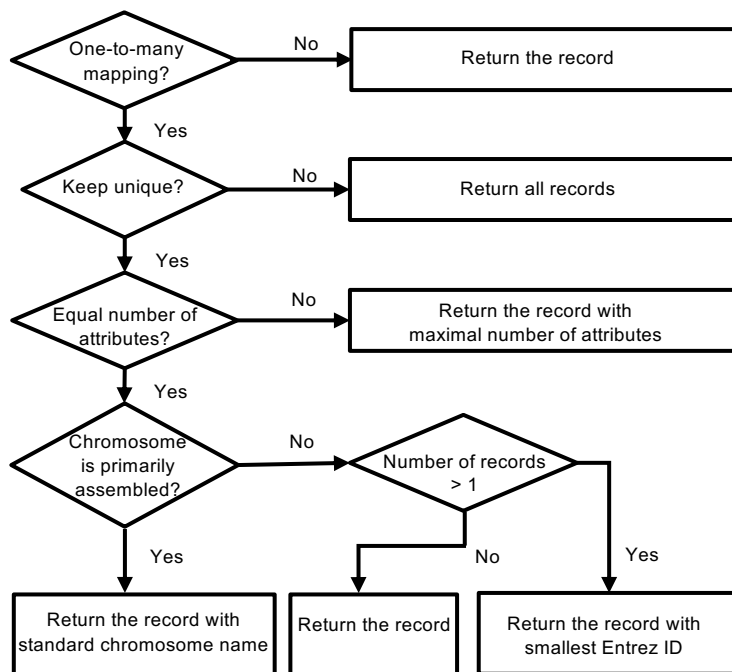

**Fig. S1.** Flowchart of one-to-many mapping rules for gene information retrieval.
